# Supplementary material for: The randomised uterine septum transsection trial (TRUST): design and protocol
Source: PubMed Central journal article supplement (PMC6173848; doi:10.1186/s12905-018-0637-6), 2018-10-05

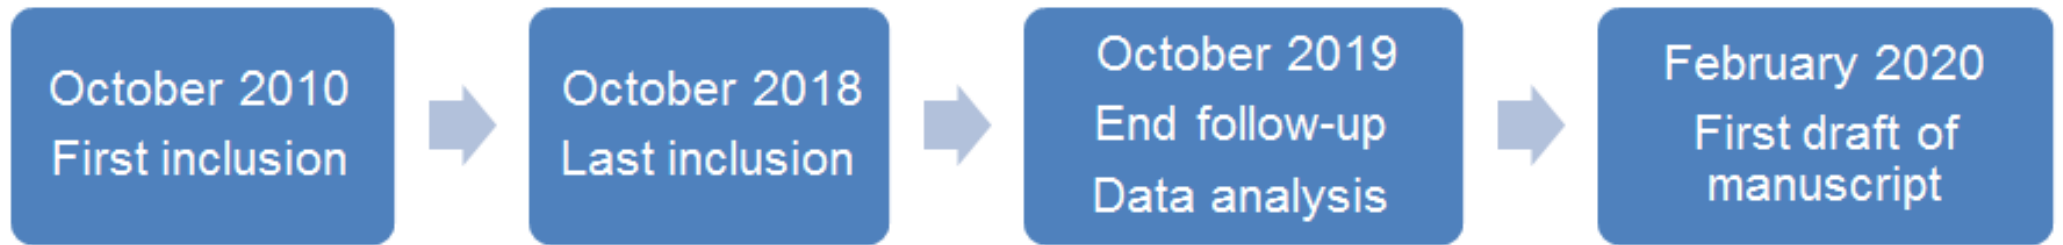

Supplement: 12905_2018_637_MOESM1_ESM.pdf [file 12905_2018_637_MOESM1_ESM.pdf]
